# Supplementary material for: Evaluating the STarTBack stratified treatment approach for low back pain: exploring study-level factors potentially explaining differences in results of studies – a literature review
Source: HighWire-hosted journal article supplement (doi:10.1136/bmjopen-2023-081704), 2024-06-01
Supplement: bmjopen-2023-081704supp001_data_supplement.pdf [file bmjopen-2023-081704supp001_data_supplement.pdf]

| Supplementary Appendix S1. Search strategy                                                                                                                                                                                                                                                                                                                                                |                                                                                                                                                                                                                                                                                               |                                                                                       |
|-------------------------------------------------------------------------------------------------------------------------------------------------------------------------------------------------------------------------------------------------------------------------------------------------------------------------------------------------------------------------------------------|-----------------------------------------------------------------------------------------------------------------------------------------------------------------------------------------------------------------------------------------------------------------------------------------------|---------------------------------------------------------------------------------------|
| MEDLINE                                                                                                                                                                                                                                                                                                                                                                                   | EMBASE                                                                                                                                                                                                                                                                                        | CINAHL                                                                                |
| 1. RCT.mp.                                                                                                                                                                                                                                                                                                                                                                                | 1. RCT.mp.                                                                                                                                                                                                                                                                                    | 1. (MH "Back Pain+")                                                                  |
| 2. randomised.mp.                                                                                                                                                                                                                                                                                                                                                                         | 2. randomised.mp.                                                                                                                                                                                                                                                                             | 2. MH low back pain/                                                                  |
| 3. Randomized Controlled Trial/                                                                                                                                                                                                                                                                                                                                                           | 3. Randomized Controlled Trial/                                                                                                                                                                                                                                                               | 3. mh radiculopathy/                                                                  |
| 4. randomised trial.mp.                                                                                                                                                                                                                                                                                                                                                                   | 4. randomised trial.mp.                                                                                                                                                                                                                                                                       | 4. mh sciatica                                                                        |
| 5. cluster.mp.                                                                                                                                                                                                                                                                                                                                                                            | 5. cluster.mp.                                                                                                                                                                                                                                                                                | 5. mh "musculoskeletal pain"                                                          |
| 6. Prospective Studies/                                                                                                                                                                                                                                                                                                                                                                   | 6. Prospective Studies/                                                                                                                                                                                                                                                                       | 6. mh back pain or low back pain or radiculopathy or sciatica or back ache or lumbago |
| 7. 1 or 2 or 3 or 4 or 5 or 6                                                                                                                                                                                                                                                                                                                                                             | 7. 1 or 2 or 3 or 4 or 5 or 6                                                                                                                                                                                                                                                                 | 7. S1 OR S2 OR S3 OR S4 OR S5 OR S6                                                   |
| 8. Back Pain/                                                                                                                                                                                                                                                                                                                                                                             | 8. Back Pain/                                                                                                                                                                                                                                                                                 | 8. mh screen*                                                                         |
| 9. low back pain/                                                                                                                                                                                                                                                                                                                                                                         | 9. low back pain/                                                                                                                                                                                                                                                                             | 9. "risk screen"                                                                      |
| 10. radiculopathy/                                                                                                                                                                                                                                                                                                                                                                        | 10. radiculopathy/                                                                                                                                                                                                                                                                            | 10. "tool"                                                                            |
| 11. sciatica/                                                                                                                                                                                                                                                                                                                                                                             | 11. sciatica/                                                                                                                                                                                                                                                                                 | 11. "instrument/"                                                                     |
| 12. (back pain or low back pain or radiculopathy or sciatica or back ache or lumbago).mp. [mp=title, book title, abstract, original title, name of substance word, subject heading word, floating sub-heading word, keyword heading word, organism supplementary concept word, protocol supplementary concept word, rare disease supplementary concept word, unique identifier, synonyms] | 12. (back pain or low back pain or radiculopathy or sciatica or back ache or lumbago).mp. [mp=title, abstract, heading word, drug trade name, original title, device manufacturer, drug manufacturer, device trade name, keyword heading word, floating subheading word, candidate term word] | 12. (mh questionnaires+ )                                                             |
| 13. Musculoskeletal Pain/                                                                                                                                                                                                                                                                                                                                                                 | 13. Musculoskeletal Pain/                                                                                                                                                                                                                                                                     | 13. "start back/"                                                                     |
| 14. 8 or 9 or 10 or 11 or 12 or 13                                                                                                                                                                                                                                                                                                                                                        | 14. 8 or 9 or 10 or 11 or 12 or 13                                                                                                                                                                                                                                                            | 14. "stratified care"                                                                 |
| 15. screen\$.mp.                                                                                                                                                                                                                                                                                                                                                                          | 15. screen\$.mp.                                                                                                                                                                                                                                                                              | 15. TX stratif                                                                        |
| 16. risk screen\$.mp.                                                                                                                                                                                                                                                                                                                                                                     | 16. risk screen\$.mp.                                                                                                                                                                                                                                                                         | 16. mh prognosis                                                                      |
| 17. tool.mp.                                                                                                                                                                                                                                                                                                                                                                              | 17. tool.mp.                                                                                                                                                                                                                                                                                  | 17. S8 OR S9 OR S10 OR S11 OR S12 OR S13 OR S14 OR S15 OR S16                         |
| 18. instrument.mp.                                                                                                                                                                                                                                                                                                                                                                        | 18. instrument.mp.                                                                                                                                                                                                                                                                            | 18. TX RCT                                                                            |
| 19. questionnaire/                                                                                                                                                                                                                                                                                                                                                                        | 19. questionnaire/                                                                                                                                                                                                                                                                            | 19. "randomised/"                                                                     |
| 20. start back.mp.                                                                                                                                                                                                                                                                                                                                                                        | 20. start back.mp.                                                                                                                                                                                                                                                                            | 20. (MH "Randomized Controlled Trials+")                                              |
| 21. stratified care.mp.                                                                                                                                                                                                                                                                                                                                                                   | 21. stratified care.mp.                                                                                                                                                                                                                                                                       | 21. TX randomised trial                                                               |
| 22. stratif\$.mp.                                                                                                                                                                                                                                                                                                                                                                         | 22. stratif\$.mp.                                                                                                                                                                                                                                                                             | 22. "cluster"                                                                         |
| 23. prognosis/                                                                                                                                                                                                                                                                                                                                                                            | 23. prognosis/                                                                                                                                                                                                                                                                                | 23. (MH "Prospective Studies+")                                                       |
| 24. 15 or 16 or 17 or 18 or 19 or 20 or 21 or 22 or 23                                                                                                                                                                                                                                                                                                                                    | 24. 15 or 16 or 17 or 18 or 19 or 20 or 21 or 22 or 23                                                                                                                                                                                                                                        | 24. S18 OR S19 OR S20 OR S21 OR S22 OR S23                                            |
| 25. 7 and 14 and 24                                                                                                                                                                                                                                                                                                                                                                       | 25. 7 and 14 and 24                                                                                                                                                                                                                                                                           | 25. S7 AND S17 AND S24                                                                |
| 26. limit 25 to humans                                                                                                                                                                                                                                                                                                                                                                    | 26. limit 25 to (human and "remove medline records")                                                                                                                                                                                                                                          |                                                                                       |

Supplementary Appendix S2. List of excluded full-text articles and the primary reason for exclusion

| Study                 | Title                                                                                                                                                                                       | Reason for exclusion                         |
|-----------------------|---------------------------------------------------------------------------------------------------------------------------------------------------------------------------------------------|----------------------------------------------|
| Beneciuk et al 2017   | Identifying Treatment Effect Modifiers in the STarT Back Trial: A Secondary Analysis                                                                                                        | Wrong study design                           |
| Bier et al 2017       | Can Primary Care for Back and/or Neck Pain in the Netherlands Benefit from Stratification for Risk Groups According to the STarT Back Tool Classification?                                  | Wrong study design                           |
| Fritz et al 2011      | Relationship Between Categorization with the STarT Back Screening Tool and Prognosis for People Receiving Physical Therapy for Low Back Pain                                                | Treatment did not follow STarTBack algorithm |
| Hill et al 2022       | Risk-based stratified primary care for common musculoskeletal pain presentations (STarT MSK): a cluster-randomised, controlled trial                                                        | STarTBack tool not used to stratify patients |
| Magel et al 2017      | Outcomes of Patients with Acute Low Back Pain Stratified by the STarT Back Screening Tool: Secondary Analysis of a Randomized Trial                                                         | Treatment did not follow STarTBack algorithm |
| Mansell et al 2016    | Exploring What Factors Mediate Treatment Effect: Example of the STarT Back Study High-Risk Intervention                                                                                     | Wrong study design                           |
| Middleton et al 2020  | Implementing stratified care for acute low back pain in primary care using the STarT Back instrument: a process evaluation within the context of a large pragmatic cluster randomized trial | Wrong study design                           |
| Saunders et al 2020   | Stratified primary care versus non-stratified care for musculoskeletal pain: qualitative findings from the STarT MSK feasibility and pilot cluster randomized controlled trial              | Wrong study design                           |
| Treanor et al 2022    | Prospective observational study investigating the predictive validity of the STarT Back tool and the clinical effectiveness of stratified care in an emergency department setting           | Wrong study design                           |
| Whitehurst et al 2015 | Implementing Stratified Primary Care Management for Low Back Pain: Cost-Utility Analysis Alongside a Prospective, Population-Based, Sequential Comparison Study                             | Wrong study design                           |

| Supplementary Appendix S3. All study level variables explored |                               |                                                                                                 |                                                                                                                                                |                                                                                                                |                                                                                        |                                                                                                                                    |                                            |                     |
|---------------------------------------------------------------|-------------------------------|-------------------------------------------------------------------------------------------------|------------------------------------------------------------------------------------------------------------------------------------------------|----------------------------------------------------------------------------------------------------------------|----------------------------------------------------------------------------------------|------------------------------------------------------------------------------------------------------------------------------------|--------------------------------------------|---------------------|
| Study                                                         | Individual administering tool | Clinician providing care                                                                        | Did the tool lead to changes in the recommended treatment?                                                                                     | Proportion receiving matched treatment?                                                                        | Risk level group                                                                       | Allocated treatment                                                                                                                | Was the tool collected in control group    | Trained to use tool |
| Beneciuk 2015                                                 | Clinician (Physiotherapist)   | All risk groups: Community physiotherapist                                                      | Not reported                                                                                                                                   | Unclear                                                                                                        | IG: Low (23%), Medium (44%), High (33%)<br><br>CG: Low (36%), Medium (41%), High (23%) | IG: Treatment based on STarTBack score<br>CG: Physiotherapy as ‘usual’                                                             | Yes                                        | Yes                 |
| Cherkin 2018                                                  | Researcher                    | All risk groups: A PCP                                                                          | Not reported                                                                                                                                   | Unclear                                                                                                        | IG: Low (40%), Medium (38%), High (22%)<br><br>CG: Low (42%), Medium (37%), High (22%) | IG: Treatment based on STarTBack score<br>CG: “Usual care”                                                                         | Yes                                        | Yes                 |
| Choudhry 2022                                                 | Unclear                       | All risk groups: Physiotherapist, “spine coach” and an “ICE MD”                                 | Not reported                                                                                                                                   | Not reported                                                                                                   | Unclear                                                                                | IG: Treatment based on STarTBack score<br>CG1: IPT<br>CG2: No intervention                                                         | Yes, but has combined medium and high risk | Not reported        |
| Delitto 2021                                                  | Unclear                       | High risk: Community physiotherapist                                                            | Higher referral for Physiotherapy in IG (high risk group) (57% vs 30%)                                                                         | Not reported                                                                                                   | IG: Low (36%), Medium (39%), High (24%)<br><br>CG: Low (36%), Medium (40%), High (24%) | IG: Treatment based on STarTBack score<br>CG: ‘Usual care’                                                                         | Yes, but only high-risk group              | Yes                 |
| Foster 2014                                                   | Clinician (GP)                | Low risk: Community GP<br><br>Medium and high risk: Referral to community physiotherapist       | Higher referral for physiotherapy in medium and high-risk group (72% vs 40%)<br><br>No difference for low-risk group (65% vs 68% not referred) | Clinician followed recommended matched treatment in 71% of patients <sup>a</sup>                               | IG: Low (37%), Medium (41%), High (22%)<br><br>CG: Low (39%), Medium (42%), High (20%) | IG: Treatment based on STarTBack score<br>CG: GP +/- physiotherapy referral if appropriate                                         | Yes                                        | Yes                 |
| Hill 2011                                                     | Researcher                    | Low risk: Research physiotherapist<br><br>Medium and high risk: Research physiotherapist        | Higher referral for Physiotherapy in IG (75% vs 58%)                                                                                           | Clinician followed recommended matched treatment in 93% of patients <sup>a</sup>                               | IG: Low (26%), Medium (46%), High (28%)<br><br>CG: Low (26%), Medium (46%), High (28%) | IG: Treatment based on STarTBack score<br>CG: Physiotherapy referral if appropriate                                                | Yes                                        | Yes                 |
| Konstantinou 2020                                             | Researcher                    | Low and medium risk: Research physiotherapist<br><br>High risk: Referred for MRI and Specialist | Not reported                                                                                                                                   | Clinician followed recommended matched treatment in: Low risk: 98.8%<br>Medium risk: 82.5%<br>High risk: 81.3% | IG: Low (22%), Medium (44%), High (34%)<br><br>CG: Low (23%), Medium (45%), High (33%) | IG: Treatment based on STarTBack score ( <i>high risk referred for MRI and to specialist</i> )<br>CG: GP and Physiotherapy consult | Yes                                        | Not reported        |
| Koppenaar 2022                                                | Unclear                       | All risk groups: Community physiotherapist                                                      | Not reported                                                                                                                                   | Not reported                                                                                                   | IG: Low (55%), Medium (36%), High (9%)<br><br>CG: Low (61%), Medium (36%), High (3%)   | IG: Treatment based on STarTBack score<br>CG: Guideline based care as per RDAP by Physiotherapist                                  | Yes                                        | Unclear             |
| Morsø 2021                                                    | Researcher                    | All risk groups: Community physiotherapist                                                      | Not reported                                                                                                                                   | Not reported                                                                                                   | IG: Low (31%), Medium (31%), High (38%)<br><br>CG: Low (31%), Medium (31%), High (38%) | IG: Treatment based on STarTBack score<br>CG: Guideline based care by GP and Physiotherapist                                       | Yes                                        | Yes                 |
| Murphy 2016                                                   | Clinician (Physiotherapist)   | All risk groups: Community physiotherapist                                                      | Not reported                                                                                                                                   | Unclear                                                                                                        | IG: Low (17%), Medium (54%), High (29%)                                                | IG: Treatment based on STarTBack score<br>CG: Generic physiotherapy                                                                | Yes                                        | Yes                 |

|                                                                                                                                                                                                                                                                                                                                                                                                                                                                                                                                                                                                                                      |                   |                                                  |              |              |                                                                                                                                 |                                                            |     |     |
|--------------------------------------------------------------------------------------------------------------------------------------------------------------------------------------------------------------------------------------------------------------------------------------------------------------------------------------------------------------------------------------------------------------------------------------------------------------------------------------------------------------------------------------------------------------------------------------------------------------------------------------|-------------------|--------------------------------------------------|--------------|--------------|---------------------------------------------------------------------------------------------------------------------------------|------------------------------------------------------------|-----|-----|
| Rhon 2023                                                                                                                                                                                                                                                                                                                                                                                                                                                                                                                                                                                                                            | Self-administered | All risk groups:<br>Community<br>physiotherapist | Not reported | Not reported | CG: Low (21%), Medium (50%), High (29%)<br>IG: Low (57%), Medium (36%), High (7%)<br><br>CG: Low (53%), Medium (39%), High (8%) | IG: Treatment based on STarTBack score<br>CG: "Usual care" | Yes | Yes |
| <div>Use of the tool=who administered the tool/who stratified patients; EMR=electronic medical records; EHR=electronic health record; GP=general practitioner; PCP=primary care practitioner; PIPT=psychologically informed physiotherapy; ICE MD= identify, coordinate, enhance (ICE) model of care; MD=medical doctor; IG=intervention group; CG=control group; RDAP=Royal Dutch Association for Physiotherapy</div> <div>Unclear=reporting of the presence of a variable did occur, however not enough information was provided for a clear definitive answer</div> <div>Not reported=no reporting of the variable occurred</div> |                   |                                                  |              |              |                                                                                                                                 |                                                            |     |     |
